# Supplementary material
Source: ML conference proceedings conference paper supplement (https://openreview.net/forum?id=gKWxifgJVP)
Supplement: supplementary_material [file attachment]

## 1 A Details for Datasets

2 **ReClor** ReClor contains 6,138 multiple-choice questions modified from standardized tests such  
3 as GMAT and LSAT, which are randomly split into train/dev/test sets with 4,638/500/1,000 samples  
4 respectively. It contains multiple logical reasoning types. The held-out test set is further divided into  
5 EASY and HARD subsets based on the performance of BERT-based model [? ].

6 **LogiQA** LogiQA consists of 8,678 multiple-choice questions collected from National Civil Ser-  
7 vants Examinations of China and are manually translated into English by experts. The dataset is  
8 randomly split into train/dev/test sets with 7,376/651/651 samples correspondingly. LogiQA also  
9 contains various logical reasoning types.

10 **MuTual** MuTual has 8,860 dialogues annotated by linguist experts and high-quality annotators  
11 from Chinese high school English listening comprehension test data. It is randomly split into  
12 train/dev/test sets with 7,088/886/886 samples respectively. There more than 6 types of reason-  
13 ing abilities reflected in MuTual. MuTual<sup>plus</sup> is an advanced version, where one of the candidate  
14 responses is replaced by a safe response (e.g., "*could you repeat that?*") for each example.
